# Supplementary material for: HOXB1 restored expression promotes apoptosis and differentiation in the HL60 leukemic cell line
Source: PubMed Central journal article supplement (PMC3874656; doi:10.1186/1475-2867-13-101), 2013-10-22
Supplement: 1475-2867-13-101-S1.pdf [file 1475-2867-13-101-S1.pdf]

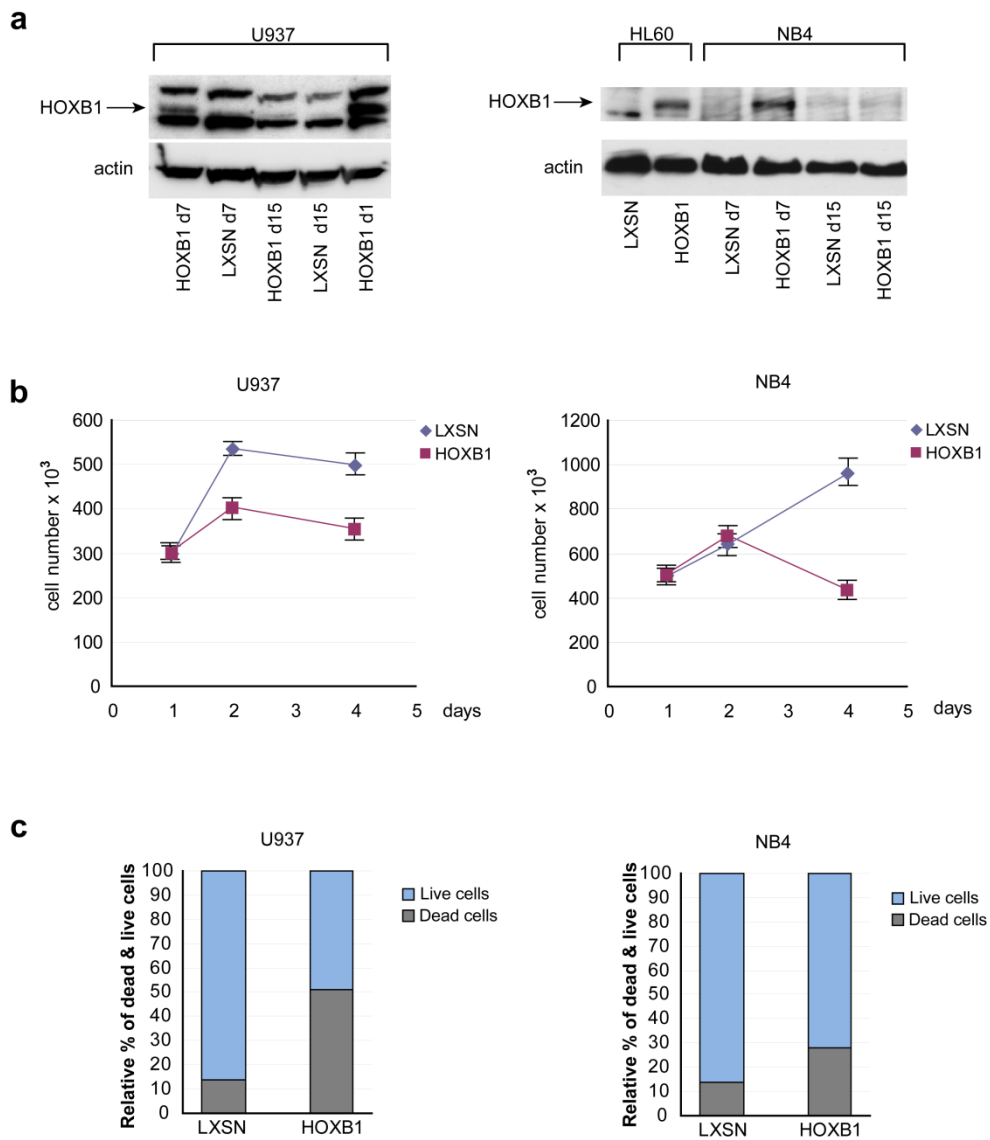

## Supplementary Figure 1

### Effects of HOXB1 restored expression in U937 and NB4 cell lines.

Western blot analysis of HOXB1 in neomycin selected LXSN- and HOXB1-transduced U937 and NB4 cell lines. Actin was used for normalization (a). Analysis of cell growth (b) and relative percentage of live and dead cells (c) in low serum condition; \* $p < 0.01$ .
